# Supplementary material for: Correlation of native and exotic species richness: a global meta‐analysis finds no invasion paradox across scales
Source: PubMed Central journal article supplement — Ecology. 2019 Jan 2;100(1):e02552. doi: 10.1002/ecy.2552 (PMC6849851; doi:10.1002/ecy.2552), 2019-01-02
Supplement: ECY-100-na-s001.pdf [file ECY-100-na-s001.pdf]

**Appendix S1.** Correlation of native and exotic species richness: a global meta-analysis finds no invasion paradox across scales. Peng et al. *Ecology*.

**PRISMA diagram**

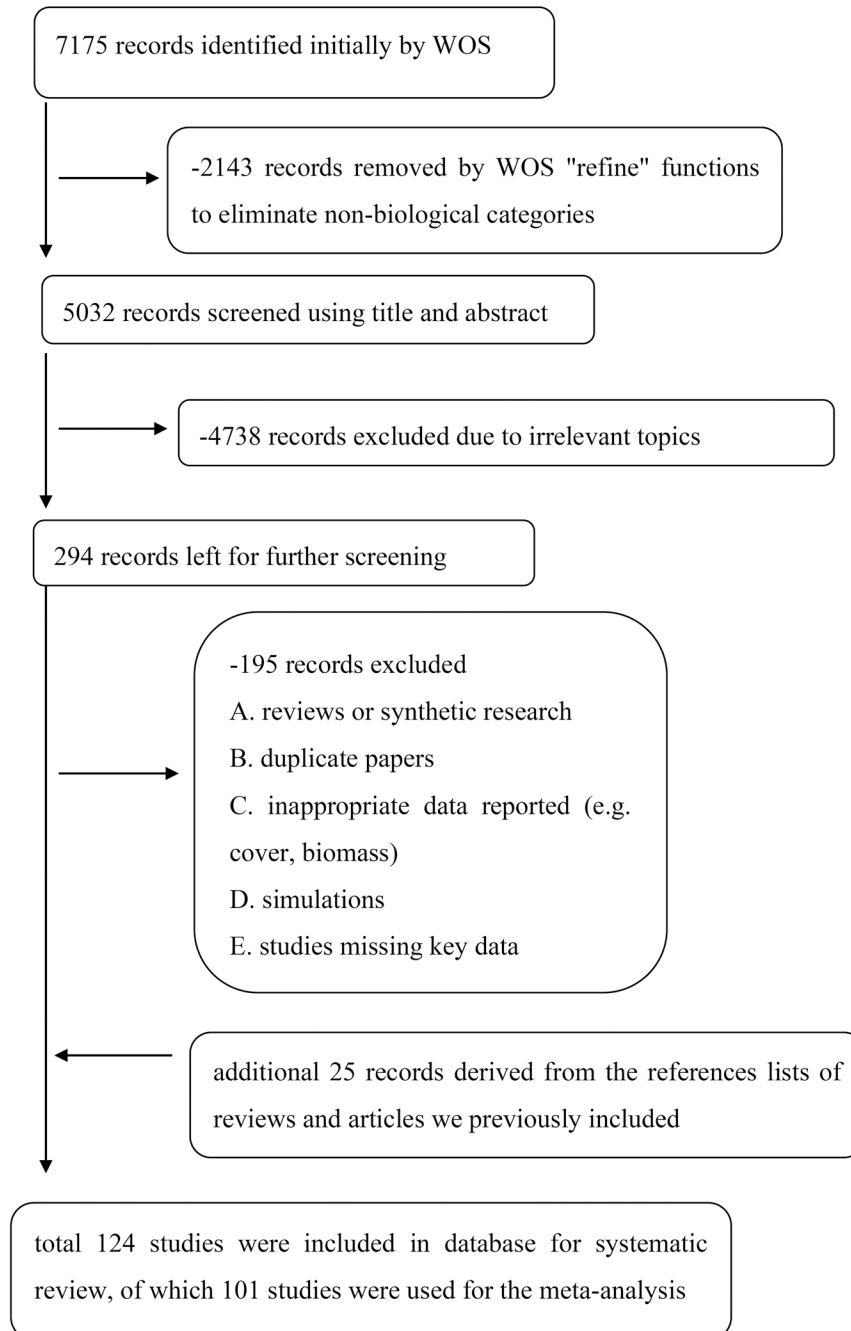

**Fig. S1** PRISMA flow diagram summarizing the paper search and inclusion processes.
