# Supplementary material for: Correlation of native and exotic species richness: a global meta‐analysis finds no invasion paradox across scales
Source: PubMed Central journal article supplement — Ecology. 2019 Jan 2;100(1):e02552. doi: 10.1002/ecy.2552 (PMC6849851; doi:10.1002/ecy.2552), 2019-01-02
Supplement: ECY-100-na-s004.pdf [file ECY-100-na-s004.pdf]

**Appendix S4.** Correlation of native and exotic species richness: a global meta-analysis finds no invasion paradox across scales. Peng et al. *Ecology*.

**Table S1** Model fit statistics used in model selection of the 16 candidate multiple covariate meta-regression models.

| <b>Covariates</b>                   | $\tau^2$ | $\omega^2$ | $Q_M$   | $p$      | $I^2$ | <b>pseudo-<math>R^2</math></b> | <b>marginal-<math>R^2</math></b> | <b>conditional-<math>R^2</math></b> | <b>AICc</b> |
|-------------------------------------|----------|------------|---------|----------|-------|--------------------------------|----------------------------------|-------------------------------------|-------------|
| grain                               | 0.1072   | 0.08469    | 33.8306 | < 0.0001 | 98.25 | 0.2202                         | 0.06247                          | 0.4074                              | 287.89      |
| grain, latitude                     | 0.1063   | 0.08346    | 35.9785 | < 0.0001 | 98.19 | 0.2287                         | 0.04917                          | 0.3973                              | 288.16      |
| grain, longitude                    | 0.09458  | 0.08270    | 44.8301 | < 0.0001 | 98.01 | 0.2796                         | 0.05269                          | 0.3929                              | 283.42      |
| grain, extent                       | 0.1073   | 0.07919    | 42.7816 | < 0.0001 | 97.87 | 0.2423                         | 0.02605                          | 0.3864                              | 295.16      |
| grain, habitat                      | 0.1039   | 0.08162    | 39.9262 | < 0.0001 | 98.03 | 0.2462                         | 0.02071                          | 0.3782                              | 295.74      |
| grain, latitude, longitude          | 0.0956   | 0.08172    | 45.5297 | < 0.0001 | 97.98 | 0.2794                         | 0.05290                          | 0.3929                              | 284.90      |
| grain, latitude, extent             | 0.1055   | 0.07887    | 44.3748 | < 0.0001 | 97.81 | 0.2509                         | 0.03831                          | 0.3929                              | 296.16      |
| grain, latitude, habitat            | 0.1031   | 0.08130    | 41.3182 | < 0.0001 | 97.98 | 0.2509                         | 0.03167                          | 0.3851                              | 296.77      |
| grain, longitude, extent            | 0.09428  | 0.0785     | 52.5426 | < 0.0001 | 97.58 | 0.2979                         | 0.02342                          | 0.3763                              | 292.30      |
| grain, longitude, habitat           | 0.09423  | 0.07928    | 50.8502 | < 0.0001 | 97.78 | 0.2949                         | 0.01996                          | 0.3730                              | 291.51      |
| grain, extent, habitat              | 0.1050   | 0.07556    | 49.7689 | < 0.0001 | 97.65 | 0.2662                         | 0.01734                          | 0.3787                              | 303.33      |
| grain, extent, habitat, latitude    | 0.1031   | 0.07592    | 50.7647 | < 0.0001 | 97.58 | 0.2724                         | 0.02276                          | 0.3818                              | 304.95      |
| grain, extent, habitat, longitude   | 0.09462  | 0.07473    | 59.0896 | < 0.0001 | 97.33 | 0.3118                         | 0.01655                          | 0.3728                              | 301.04      |
| grain, latitude, longitude, habitat | 0.09455  | 0.07894    | 51.2835 | < 0.0001 | 97.74 | 0.2950                         | 0.02184                          | 0.3744                              | 293.39      |
| grain, longitude, extent, latitude  | 0.09460  | 0.07805    | 53.0125 | < 0.0001 | 97.54 | 0.2984                         | 0.02572                          | 0.3778                              | 294.20      |
| Full model                          | 0.09435  | 0.07473    | 59.3892 | < 0.0001 | 97.27 | 0.3129                         | 0.01730                          | 0.3734                              | 303.26      |

**Table S2** Estimates and 95% confidence intervals (CIs) for Fisher's  $z$  from single covariate meta-regressions.

| <b>Covariates</b> | <b>Subgroup</b>                      | <b><math>z</math></b> | <b>Lower CI</b>        | <b>Upper CI</b>        |
|-------------------|--------------------------------------|-----------------------|------------------------|------------------------|
| Grain             | Intercept                            | 0.1294                | 0.0193                 | 0.2395                 |
| Grain             | ln grain                             | 0.0373                | 0.0247                 | 0.0498                 |
| Extent            | (0, 10)                              | 0.3767                | 0.1801                 | 0.5734                 |
| Extent            | [10, 100)                            | 0.4071                | 0.1341                 | 0.6802                 |
| Extent            | [10 <sup>2</sup> , 10 <sup>3</sup> ) | 0.2497                | 0.0510                 | 0.4483                 |
| Extent            | [10 <sup>3</sup> , 10 <sup>4</sup> ) | 0.2625                | 0.0481                 | 0.4770                 |
| Extent            | [10 <sup>4</sup> , 10 <sup>5</sup> ) | 0.1658                | -0.1252                | 0.4568                 |
| Extent            | [10 <sup>5</sup> , 10 <sup>6</sup> ) | 0.4123                | 0.1922                 | 0.6323                 |
| Extent            | [10 <sup>6</sup> , )                 | 0.5133                | 0.1868                 | 0.8398                 |
| Habitat (full)    | Agricultural                         | 0.2822                | -0.0562                | 0.6207                 |
| Habitat (full)    | Forest                               | 0.2798                | 0.0922                 | 0.4674                 |
| Habitat (full)    | Grassland                            | 0.1506                | -0.0403                | 0.3414                 |
| Habitat (full)    | Many                                 | 0.4965                | 0.3102                 | 0.6828                 |
| Habitat (full)    | Shrubland                            | 0.2798                | -0.0234                | 0.5830                 |
| Habitat (full)    | Urban                                | 0.8318                | 0.4336                 | 1.2300                 |
| Habitat (full)    | Wetland                              | 0.2666                | 0.0753                 | 0.4580                 |
| Habitat           | Agricultural                         | 0.2836                | -0.0575                | 0.6248                 |
| Habitat           | Forest                               | 0.2833                | 0.0946                 | 0.4721                 |
| Habitat           | Grassland                            | 0.1561                | -0.0365                | 0.3486                 |
| Habitat           | Shrubland                            | 0.2802                | -0.0249                | 0.5853                 |
| Habitat           | Urban                                | 0.8312                | 0.4302                 | 1.2321                 |
| Habitat           | Wetland                              | 0.2683                | 0.0759                 | 0.4606                 |
| Latitude          | Intercept                            | -0.2268               | -0.7959                | 0.3424                 |
| Latitude          | Latitude                             | 0.0136                | -0.0001                | 0.0274                 |
| Longitude         | Intercept                            | 0.6033                | 0.4411                 | 0.7654                 |
| Longitude         | Longitude                            | 0.0002                | -0.0009                | 0.0012                 |
| Longitude         | Longitude <sup>2</sup>               | 0.0000                | -4.06×10 <sup>-5</sup> | -1.57×10 <sup>-5</sup> |

**Table S3** Estimates and 95% confidence intervals (CIs) for Fisher's  $z$  from multiple covariate meta-regression models with interaction terms.

| Covariate                    | Subgroup                                               | $z$     | Lower CI | Upper CI |
|------------------------------|--------------------------------------------------------|---------|----------|----------|
| Grain $\times$ Extent (ord.) | Intercept                                              | 0.1139  | -0.0130  | 0.2408   |
| Grain $\times$ Extent (ord.) | ln grain                                               | 0.0448  | 0.0295   | 0.0601   |
| Grain $\times$ Extent (ord.) | linear term (Extent)                                   | -0.0598 | -0.4029  | 0.2833   |
| Grain $\times$ Extent (ord.) | quadratic term (Extent)                                | 0.0267  | -0.3146  | 0.3680   |
| Grain $\times$ Extent (ord.) | cubic term (Extent)                                    | -0.0760 | -0.4035  | 0.2515   |
| Grain $\times$ Extent (ord.) | fourth-order term (Extent)                             | -0.1491 | -0.4106  | 0.1123   |
| Grain $\times$ Extent (ord.) | fifth-order term (Extent)                              | 0.0510  | -0.2380  | 0.3400   |
| Grain $\times$ Extent (ord.) | sixth-order term (Extent)                              | -0.0645 | -0.3580  | 0.2290   |
| Grain $\times$ Extent (ord.) | ln grain $\times$ linear term (Extent)                 | -0.0451 | -0.0853  | -0.0049  |
| Grain $\times$ Extent (ord.) | ln grain $\times$ quadratic term (Extent)              | 0.0479  | 0.0096   | 0.0863   |
| Grain $\times$ Extent (ord.) | ln grain $\times$ cubic term (Extent)                  | 0.0069  | -0.0354  | 0.0491   |
| Grain $\times$ Extent (ord.) | ln grain $\times$ fourth-order term (Extent)           | 0.0135  | -0.0239  | 0.0509   |
| Grain $\times$ Extent (ord.) | ln grain $\times$ fifth-order term (Extent)            | -0.0261 | -0.0693  | 0.0171   |
| Grain $\times$ Extent (ord.) | ln grain $\times$ sixth-order term (Extent)            | 0.0056  | -0.0330  | 0.0442   |
| Grain $\times$ Extent (cat.) | Intercept                                              | 0.1496  | -0.0435  | 0.3427   |
| Grain $\times$ Extent (cat.) | ln grain                                               | 0.1000  | 0.0606   | 0.1394   |
| Grain $\times$ Extent (cat.) | [10, 100)                                              | 0.0749  | -0.2626  | 0.4124   |
| Grain $\times$ Extent (cat.) | [10 <sup>2</sup> , 10 <sup>3</sup> )                   | -0.1359 | -0.4247  | 0.1529   |
| Grain $\times$ Extent (cat.) | [10 <sup>3</sup> , 10 <sup>4</sup> )                   | -0.0771 | -0.4020  | 0.2478   |
| Grain $\times$ Extent (cat.) | [10 <sup>4</sup> , 10 <sup>5</sup> )                   | -0.0408 | -0.4710  | 0.3895   |
| Grain $\times$ Extent (cat.) | [10 <sup>5</sup> , 10 <sup>6</sup> )                   | 0.0472  | -0.2591  | 0.3536   |
| Grain $\times$ Extent (cat.) | [10 <sup>6</sup> , )                                   | -0.1187 | -0.6390  | 0.4016   |
| Grain $\times$ Extent (cat.) | ln grain $\times$ [10, 100)                            | -0.0555 | -0.1217  | 0.0107   |
| Grain $\times$ Extent (cat.) | ln grain $\times$ [10 <sup>2</sup> , 10 <sup>3</sup> ) | -0.0415 | -0.0971  | 0.0141   |
| Grain $\times$ Extent (cat.) | ln grain $\times$ [10 <sup>3</sup> , 10 <sup>4</sup> ) | -0.0733 | -0.1217  | -0.0249  |
| Grain $\times$ Extent (cat.) | ln grain $\times$ [10 <sup>4</sup> , 10 <sup>5</sup> ) | -0.0926 | -0.1580  | -0.0273  |
| Grain $\times$ Extent (cat.) | ln grain $\times$ [10 <sup>5</sup> , 10 <sup>6</sup> ) | -0.0724 | -0.1171  | -0.0277  |
| Grain $\times$ Extent (cat.) | ln grain $\times$ [10 <sup>6</sup> , )                 | -0.0512 | -0.1061  | 0.0036   |

|                 |                                |         |         |        |
|-----------------|--------------------------------|---------|---------|--------|
| Grain × Habitat | Intercept                      | 0.2526  | -0.0730 | 0.5781 |
| Grain × Habitat | ln grain                       | 0.0147  | -0.0440 | 0.0734 |
| Grain × Habitat | forest (Habitat)               | -0.1165 | -0.4991 | 0.2660 |
| Grain × Habitat | grassland (Habitat)            | -0.2600 | -0.6150 | 0.0950 |
| Grain × Habitat | shrubland (Habitat)            | -0.1764 | -0.6852 | 0.3325 |
| Grain × Habitat | urban (Habitat)                | 0.0691  | -0.7027 | 0.8410 |
| Grain × Habitat | wetland (Habitat)              | -0.0563 | -0.4431 | 0.3305 |
| Grain × Habitat | ln grain × forest (Habitat)    | 0.0255  | -0.0411 | 0.0921 |
| Grain × Habitat | ln grain × grassland (Habitat) | 0.0578  | -0.0137 | 0.1293 |
| Grain × Habitat | ln grain × shrubland (Habitat) | 0.0447  | -0.0585 | 0.1479 |
| Grain × Habitat | ln grain × urban (Habitat)     | 0.0405  | -0.0452 | 0.1262 |
| Grain × Habitat | ln grain × wetland (Habitat)   | 0.0021  | -0.0651 | 0.0693 |

---

**Table S4** Estimates and 95% confidence intervals (CIs) for Fisher's  $z$  from multiple covariate meta-regressions used in model selection.

| <b>Model</b>               | <b>Coefficient</b>                   | <b><math>z</math></b>  | <b>Lower CI</b>        | <b>Upper CI</b>        |
|----------------------------|--------------------------------------|------------------------|------------------------|------------------------|
| Grain, Latitude            | Intercept                            | -0.2164                | -0.7282                | 0.2954                 |
| Grain, Latitude            | ln grain                             | 0.0361                 | 0.0235                 | 0.0487                 |
| Grain, Latitude            | Latitude                             | 0.0086                 | -0.0038                | 0.0211                 |
| Grain, longitude           | Intercept                            | 0.3153                 | 0.1219                 | 0.5086                 |
| Grain, longitude           | ln grain                             | 0.0316                 | 0.0185                 | 0.0447                 |
| Grain, longitude           | Longitude                            | -0.0003                | -0.0013                | 0.0008                 |
| Grain, longitude           | Longitude <sup>2</sup>               | $-1.80 \times 10^{-5}$ | $-3.03 \times 10^{-5}$ | $-5.56 \times 10^{-6}$ |
| Grain, extent              | Intercept                            | 0.2671                 | 0.0906                 | 0.4436                 |
| Grain, extent              | ln grain                             | 0.0415                 | 0.0282                 | 0.0549                 |
| Grain, extent              | [10, 100)                            | -0.0157                | -0.3101                | 0.2788                 |
| Grain, extent              | [10 <sup>2</sup> , 10 <sup>3</sup> ) | -0.1777                | -0.4211                | 0.0658                 |
| Grain, extent              | [10 <sup>3</sup> , 10 <sup>4</sup> ) | -0.3005                | -0.5664                | -0.0347                |
| Grain, extent              | [10 <sup>4</sup> , 10 <sup>5</sup> ) | -0.3200                | -0.6283                | -0.0118                |
| Grain, extent              | [10 <sup>5</sup> , 10 <sup>6</sup> ) | -0.1765                | -0.4416                | 0.0885                 |
| Grain, extent              | [10 <sup>6</sup> , )                 | -0.1809                | -0.5297                | 0.1679                 |
| Grain, habitat             | Intercept                            | 0.2329                 | -0.0802                | 0.5461                 |
| Grain, habitat             | ln grain                             | 0.0367                 | 0.0222                 | 0.0512                 |
| Grain, habitat             | Forest                               | -0.0901                | -0.4478                | 0.2676                 |
| Grain, habitat             | Grassland                            | -0.1735                | -0.5099                | 0.1629                 |
| Grain, habitat             | Many                                 | -0.1458                | -0.5268                | 0.2352                 |
| Grain, habitat             | Shrubland                            | -0.0837                | -0.5025                | 0.3351                 |
| Grain, habitat             | Urban                                | 0.2577                 | -0.2362                | 0.7517                 |
| Grain, habitat             | Wetland                              | -0.0985                | -0.4580                | 0.2610                 |
| Grain, latitude, longitude | Intercept                            | 0.0954                 | -0.4658                | 0.6566                 |
| Grain, latitude, longitude | ln grain                             | 0.0313                 | 0.0182                 | 0.0444                 |
| Grain, latitude, longitude | Latitude                             | 0.0051                 | -0.0072                | 0.0175                 |
| Grain, latitude, longitude | Longitude                            | -0.0003                | -0.0013                | 0.0008                 |
| Grain, latitude, longitude | Longitude <sup>2</sup>               | $-1.68 \times 10^{-5}$ | $-2.95 \times 10^{-5}$ | $-4.18 \times 10^{-6}$ |
| Grain, latitude, extent    | Intercept                            | -0.0391                | -0.5920                | 0.5138                 |

|                           |                                      |                        |                        |                        |
|---------------------------|--------------------------------------|------------------------|------------------------|------------------------|
| Grain, latitude, extent   | ln grain                             | 0.0407                 | 0.0273                 | 0.0541                 |
| Grain, latitude, extent   | Latitude                             | 0.0074                 | -0.0053                | 0.0201                 |
| Grain, latitude, extent   | [10, 100)                            | 0.0026                 | -0.2921                | 0.2972                 |
| Grain, latitude, extent   | [10 <sup>2</sup> , 10 <sup>3</sup> ) | -0.1564                | -0.4012                | 0.0884                 |
| Grain, latitude, extent   | [10 <sup>3</sup> , 10 <sup>4</sup> ) | -0.2815                | -0.5479                | -0.0151                |
| Grain, latitude, extent   | [10 <sup>4</sup> , 10 <sup>5</sup> ) | -0.3084                | -0.6156                | -0.0011                |
| Grain, latitude, extent   | [10 <sup>5</sup> , 10 <sup>6</sup> ) | -0.1835                | -0.4475                | 0.0806                 |
| Grain, latitude, extent   | [10 <sup>6</sup> , )                 | -0.1845                | -0.5317                | 0.1626                 |
| Grain, latitude, habitat  | Intercept                            | -0.1057                | -0.7870                | 0.5756                 |
| Grain, latitude, habitat  | ln grain                             | 0.0353                 | 0.0207                 | 0.0500                 |
| Grain, latitude, habitat  | Latitude                             | 0.0073                 | -0.0057                | 0.0202                 |
| Grain, latitude, habitat  | Forest                               | -0.0341                | -0.4047                | 0.3365                 |
| Grain, latitude, habitat  | Grassland                            | -0.1287                | -0.4737                | 0.2163                 |
| Grain, latitude, habitat  | Many                                 | -0.0882                | -0.4820                | 0.3057                 |
| Grain, latitude, habitat  | Shrubland                            | -0.0145                | -0.4503                | 0.4214                 |
| Grain, latitude, habitat  | Urban                                | 0.2910                 | -0.2054                | 0.7874                 |
| Grain, latitude, habitat  | Wetland                              | -0.0500                | -0.4189                | 0.3190                 |
| Grain, longitude, extent  | Intercept                            | 0.4129                 | 0.1847                 | 0.6410                 |
| Grain, longitude, extent  | ln grain                             | 0.0362                 | 0.0223                 | 0.0501                 |
| Grain, longitude, extent  | Longitude                            | -0.0003                | -0.0013                | 0.0008                 |
| Grain, longitude, extent  | Longitude <sup>2</sup>               | -1.70×10 <sup>-5</sup> | -2.96×10 <sup>-5</sup> | -4.47×10 <sup>-6</sup> |
| Grain, longitude, extent  | [10, 100)                            | -0.0160                | -0.3016                | 0.2697                 |
| Grain, longitude, extent  | [10 <sup>2</sup> , 10 <sup>3</sup> ) | -0.1046                | -0.3467                | 0.1376                 |
| Grain, longitude, extent  | [10 <sup>3</sup> , 10 <sup>4</sup> ) | -0.2921                | -0.5495                | -0.0347                |
| Grain, longitude, extent  | [10 <sup>4</sup> , 10 <sup>5</sup> ) | -0.2433                | -0.5465                | 0.0599                 |
| Grain, longitude, extent  | [10 <sup>5</sup> , 10 <sup>6</sup> ) | -0.1380                | -0.3954                | 0.1195                 |
| Grain, longitude, extent  | [10 <sup>6</sup> , )                 | -0.1799                | -0.5175                | 0.1576                 |
| Grain, longitude, habitat | Intercept                            | 0.3437                 | 0.0134                 | 0.6739                 |
| Grain, longitude, habitat | ln grain                             | 0.0315                 | 0.0162                 | 0.0468                 |
| Grain, longitude, habitat | Longitude                            | -0.0006                | -0.0018                | 0.0005                 |
| Grain, longitude, habitat | Longitude <sup>2</sup>               | -1.60×10 <sup>-5</sup> | -2.90×10 <sup>-5</sup> | -3.02×10 <sup>-6</sup> |
| Grain, longitude, habitat | Forest                               | -0.0796                | -0.4314                | 0.2722                 |
| Grain, longitude, habitat | Grassland                            | -0.1248                | -0.4622                | 0.2125                 |

|                                  |                                      |         |         |         |
|----------------------------------|--------------------------------------|---------|---------|---------|
| Grain, longitude, habitat        | Many                                 | -0.0972 | -0.4755 | 0.2811  |
| Grain, longitude, habitat        | Shrubland                            | -0.0277 | -0.4436 | 0.3882  |
| Grain, longitude, habitat        | Urban                                | 0.3293  | -0.1568 | 0.8155  |
| Grain, longitude, habitat        | Wetland                              | -0.0810 | -0.4304 | 0.2684  |
| Grain, extent, habitat           | Intercept                            | 0.3544  | 0.0026  | 0.7061  |
| Grain, extent, habitat           | ln grain                             | 0.0392  | 0.0244  | 0.0541  |
| Grain, extent, habitat           | [10, 100)                            | -0.0737 | -0.4025 | 0.2551  |
| Grain, extent, habitat           | [10 <sup>2</sup> , 10 <sup>3</sup> ) | -0.2383 | -0.4869 | 0.0104  |
| Grain, extent, habitat           | [10 <sup>3</sup> , 10 <sup>4</sup> ) | -0.3340 | -0.6096 | -0.0584 |
| Grain, extent, habitat           | [10 <sup>4</sup> , 10 <sup>5</sup> ) | -0.3281 | -0.6413 | -0.0149 |
| Grain, extent, habitat           | [10 <sup>5</sup> , 10 <sup>6</sup> ) | -0.2229 | -0.4954 | 0.0496  |
| Grain, extent, habitat           | [10 <sup>6</sup> , )                 | -0.2196 | -0.5691 | 0.1299  |
| Grain, extent, habitat           | Forest                               | -0.0372 | -0.4021 | 0.3276  |
| Grain, extent, habitat           | Grassland                            | -0.1603 | -0.5090 | 0.1885  |
| Grain, extent, habitat           | Many                                 | -0.0456 | -0.4401 | 0.3490  |
| Grain, extent, habitat           | Shrubland                            | -0.0344 | -0.4535 | 0.3847  |
| Grain, extent, habitat           | Urban                                | 0.3390  | -0.1718 | 0.8499  |
| Grain, extent, habitat           | Wetland                              | -0.0209 | -0.3882 | 0.3464  |
| Grain, extent, habitat, latitude | Intercept                            | 0.0628  | -0.6577 | 0.7833  |
| Grain, extent, habitat, latitude | ln grain                             | 0.0383  | 0.0233  | 0.0533  |
| Grain, extent, habitat, latitude | [10, 100)                            | -0.0549 | -0.3848 | 0.2749  |
| Grain, extent, habitat, latitude | [10 <sup>2</sup> , 10 <sup>3</sup> ) | -0.2222 | -0.4721 | 0.0276  |
| Grain, extent, habitat, latitude | [10 <sup>3</sup> , 10 <sup>4</sup> ) | -0.3211 | -0.5970 | -0.0453 |
| Grain, extent, habitat, latitude | [10 <sup>4</sup> , 10 <sup>5</sup> ) | -0.3189 | -0.6315 | -0.0063 |
| Grain, extent, habitat, latitude | [10 <sup>5</sup> , 10 <sup>6</sup> ) | -0.2288 | -0.5007 | 0.0432  |
| Grain, extent, habitat, latitude | [10 <sup>6</sup> , )                 | -0.2245 | -0.5729 | 0.1239  |
| Grain, extent, habitat, latitude | Forest                               | 0.0099  | -0.3677 | 0.3875  |
| Grain, extent, habitat, latitude | Grassland                            | -0.1210 | -0.4793 | 0.2373  |
| Grain, extent, habitat, latitude | Many                                 | 0.0029  | -0.4046 | 0.4104  |
| Grain, extent, habitat, latitude | Shrubland                            | 0.0168  | -0.4161 | 0.4498  |
| Grain, extent, habitat, latitude | Urban                                | 0.3645  | -0.1482 | 0.8771  |
| Grain, extent, habitat, latitude | Wetland                              | 0.0189  | -0.3574 | 0.3952  |
| Grain, extent, habitat, latitude | Latitude                             | 0.0061  | -0.0071 | 0.0193  |

|                                   |                                      |                        |                        |                        |
|-----------------------------------|--------------------------------------|------------------------|------------------------|------------------------|
| Grain, extent, habitat, longitude | Intercept                            | 0.4484                 | 0.0863                 | 0.8106                 |
| Grain, extent, habitat, longitude | ln grain                             | 0.0349                 | 0.0193                 | 0.0506                 |
| Grain, extent, habitat, longitude | [10, 100)                            | -0.0843                | -0.4049                | 0.2364                 |
| Grain, extent, habitat, longitude | [10 <sup>2</sup> , 10 <sup>3</sup> ) | -0.1631                | -0.4104                | 0.0841                 |
| Grain, extent, habitat, longitude | [10 <sup>3</sup> , 10 <sup>4</sup> ) | -0.3320                | -0.6008                | -0.0633                |
| Grain, extent, habitat, longitude | [10 <sup>4</sup> , 10 <sup>5</sup> ) | -0.2460                | -0.5555                | 0.0636                 |
| Grain, extent, habitat, longitude | [10 <sup>5</sup> , 10 <sup>6</sup> ) | -0.1927                | -0.4600                | 0.0745                 |
| Grain, extent, habitat, longitude | [10 <sup>6</sup> , )                 | -0.2284                | -0.5689                | 0.1121                 |
| Grain, extent, habitat, longitude | Forest                               | -0.0512                | -0.4114                | 0.3090                 |
| Grain, extent, habitat, longitude | Grassland                            | -0.1425                | -0.4936                | 0.2086                 |
| Grain, extent, habitat, longitude | Many                                 | -0.0282                | -0.4198                | 0.3634                 |
| Grain, extent, habitat, longitude | Shrubland                            | 0.0047                 | -0.4117                | 0.4210                 |
| Grain, extent, habitat, longitude | Urban                                | 0.3638                 | -0.1366                | 0.8642                 |
| Grain, extent, habitat, longitude | Wetland                              | -0.0372                | -0.3949                | 0.3204                 |
| Grain, extent, habitat, longitude | Longitude                            | -0.0007                | -0.0018                | 0.0005                 |
| Grain, extent, habitat, longitude | Longitude <sup>2</sup>               | -1.47×10 <sup>-5</sup> | -2.79×10 <sup>-5</sup> | -1.46×10 <sup>-6</sup> |
| Grain, extent, habitat, latitude  | Intercept                            | 0.1440                 | -0.5537                | 0.8417                 |
| Grain, extent, habitat, latitude  | ln grain                             | 0.0309                 | 0.0156                 | 0.0463                 |
| Grain, extent, habitat, latitude  | Forest                               | -0.0488                | -0.4134                | 0.3157                 |
| Grain, extent, habitat, latitude  | Grassland                            | -0.1020                | -0.4465                | 0.2425                 |
| Grain, extent, habitat, latitude  | Many                                 | -0.0666                | -0.4563                | 0.3231                 |
| Grain, extent, habitat, latitude  | Shrubland                            | 0.0092                 | -0.4219                | 0.4402                 |
| Grain, extent, habitat, latitude  | Urban                                | 0.3472                 | -0.1419                | 0.8363                 |
| Grain, extent, habitat, latitude  | Wetland                              | -0.0537                | -0.4131                | 0.3056                 |
| Grain, extent, habitat, latitude  | Latitude                             | 0.0042                 | -0.0086                | 0.0170                 |
| Grain, extent, habitat, latitude  | Longitude                            | -0.0006                | -0.0018                | 0.0005                 |
| Grain, extent, habitat, latitude  | Longitude <sup>2</sup>               | -1.53×10 <sup>-5</sup> | -2.85×10 <sup>-5</sup> | -2.17×10 <sup>-6</sup> |
| Grain, extent, habitat, longitude | Intercept                            | 0.2290                 | -0.3675                | 0.8255                 |
| Grain, extent, habitat, longitude | ln grain                             | 0.0360                 | 0.0222                 | 0.0499                 |
| Grain, extent, habitat, longitude | [10, 100)                            | -0.0055                | -0.2928                | 0.2817                 |
| Grain, extent, habitat, longitude | [10 <sup>2</sup> , 10 <sup>3</sup> ) | -0.0956                | -0.3393                | 0.1481                 |
| Grain, extent, habitat, longitude | [10 <sup>3</sup> , 10 <sup>4</sup> ) | -0.2823                | -0.5414                | -0.0232                |
| Grain, extent, habitat, longitude | [10 <sup>4</sup> , 10 <sup>5</sup> ) | -0.2403                | -0.5436                | 0.0629                 |



|                                   |                                      |                        |                        |                        |
|-----------------------------------|--------------------------------------|------------------------|------------------------|------------------------|
| Grain, extent, habitat, longitude | [10 <sup>5</sup> , 10 <sup>6</sup> ) | -0.1445                | -0.4025                | 0.1136                 |
| Grain, extent, habitat, longitude | [10 <sup>6</sup> , )                 | -0.1821                | -0.5197                | 0.1554                 |
| Grain, extent, habitat, longitude | Latitude                             | 0.0042                 | -0.0084                | 0.0168                 |
| Grain, extent, habitat, longitude | Longitude                            | -0.0003                | -0.0013                | 0.0008                 |
| Grain, extent, habitat, longitude | Longitude <sup>2</sup>               | -1.61×10 <sup>-5</sup> | -2.89×10 <sup>-5</sup> | -3.29×10 <sup>-6</sup> |
| Full model                        | Intercept                            | 0.2822                 | -0.4533                | 1.0177                 |
| Full model                        | ln grain                             | 0.0346                 | 0.0189                 | 0.0503                 |
| Full model                        | Latitude                             | 0.0034                 | -0.0097                | 0.0164                 |
| Full model                        | Longitude                            | -0.0007                | -0.0018                | 0.0005                 |
| Full model                        | Longitude <sup>2</sup>               | -1.41×10 <sup>-5</sup> | -2.75×10 <sup>-5</sup> | -7.12×10 <sup>-7</sup> |
| Full model                        | [10, 100)                            | -0.0739                | -0.3968                | 0.2489                 |
| Full model                        | [10 <sup>2</sup> , 10 <sup>3</sup> ) | -0.1568                | -0.4050                | 0.0914                 |
| Full model                        | [10 <sup>3</sup> , 10 <sup>4</sup> ) | -0.3255                | -0.5951                | -0.0558                |
| Full model                        | [10 <sup>4</sup> , 10 <sup>5</sup> ) | -0.2440                | -0.5534                | 0.0655                 |
| Full model                        | [10 <sup>5</sup> , 10 <sup>6</sup> ) | -0.1977                | -0.4654                | 0.0701                 |
| Full model                        | [10 <sup>6</sup> , )                 | -0.2309                | -0.5714                | 0.1095                 |
| Full model                        | Forest                               | -0.0254                | -0.3988                | 0.3480                 |
| Full model                        | Grassland                            | -0.1225                | -0.4818                | 0.2368                 |
| Full model                        | Many                                 | -0.0025                | -0.4062                | 0.4012                 |
| Full model                        | Shrubland                            | 0.0312                 | -0.3974                | 0.4599                 |
| Full model                        | Urban                                | 0.3786                 | -0.1248                | 0.8821                 |
| Full model                        | Wetland                              | -0.0144                | -0.3825                | 0.3536                 |

---
