# Supplementary material for: Correlation of native and exotic species richness: a global meta‐analysis finds no invasion paradox across scales
Source: PubMed Central journal article supplement — Ecology. 2019 Jan 2;100(1):e02552. doi: 10.1002/ecy.2552 (PMC6849851; doi:10.1002/ecy.2552), 2019-01-02
Supplement: ECY-100-na-s006.pdf [file ECY-100-na-s006.pdf]

**Appendix S6.** Correlation of native and exotic species richness: a global meta-analysis finds no invasion paradox across scales. Peng et al. *Ecology*.

Publications used in meta-analysis and systematic review. There are total 124 papers, of which 101 papers used in meta-analysis. \* represents additional 23 papers used in systematic review.

Abella, S. R., E. C. Engel, J. D. Springer, and W. W. Covington. 2012. Relationships of exotic plant communities with native vegetation, environmental factors, disturbance, and landscape ecosystems of *Pinus ponderosa* forests, USA. *Forest Ecology and Management* **271**:65-74.

Abella, S. R., and A. Tendick. 2013. Distribution of exotic plant species and relationship to vegetation type at Bryce Canyon National Park, USA. *Landscape and Urban Planning* **120**:48-58.

Adams, S. N., and K. A. Engelhardt. 2009. Diversity declines in *Microstegium vimineum* (Japanese stiltgrass) patches. *Biological Conservation* **142**:1003-1010.

Aguiar, F. C., M. T. Ferreira, and A. Albuquerque. 2006. Patterns of exotic and native plant species richness and cover along a semi-arid Iberian river and across its floodplain. *Plant Ecology* **184**:189-202.

Bangert, R., and N. Huntly. 2010. The distribution of native and exotic plants in a naturally fragmented sagebrush-steppe landscape. *Biological Invasions* **12**:1627-1640.

Bartomeus, I., D. Sol, J. Pino, P. Vicente, and X. Font. 2012. Deconstructing the native–exotic richness relationship in plants. *Global Ecology and Biogeography* **21**:524-533.

Belote, R. T., R. H. Jones, S. M. Hood, and B. W. Wender. 2008. Diversity–invasibility across an experimental disturbance gradient in Appalachian forests. *Ecology* **89**:183-192.

Belote, R. T., L. J. Makarick, M. J. Kearsley, and C. L. Lauer. 2010. Tamarisk removal in Grand Canyon National Park: Changing the native–non-native relationship as a restoration goal. *Ecological Restoration* **28**:449-459.

Bennett, J. R., P. W. Dunwiddie, D. E. Giblin, and P. Arcese. 2012. Native versus exotic community patterns across three scales: roles of competition, environment and incomplete invasion. *Perspectives in Plant Ecology, Evolution and Systematics*

14:381-392.

- Boughton, E. H., P. F. Quintana-Ascencio, D. Nickerson, and P. J. Bohlen. 2011. Management intensity affects the relationship between non-native and native species in subtropical wetlands. *Applied Vegetation Science* **14**:210-220.
- Boutin, C., A. Baril, and P. Martin. 2008. Plant diversity in crop fields and woody hedgerows of organic and conventional farms in contrasting landscapes. *Agriculture, Ecosystems & Environment* **123**:185-193.
- Brandt, A. J., and E. W. Seabloom. 2011. Regional and decadal patterns of native and exotic plant coexistence in California grasslands. *Ecological Applications* **21**:704-714.
- Brooks, W. R., J. L. Lockwood, and R. C. Jordan. 2013. Tropical paradox: a multi-scale analysis of the invasion paradox within Miami Rock Ridge tropical hardwood hammocks. *Biological Invasions* **15**:921-930.
- Brown, R. L., and R. K. Peet. 2003. Diversity and invasibility of southern Appalachian plant communities. *Ecology* **84**:32-39.
- Brummer, T., A. Byrom, J. Sullivan, and P. Hulme. 2016. Alien and native plant richness and abundance respond to different environmental drivers across multiple gravel floodplain ecosystems. *Diversity and Distributions* **22**:823-835.
- Bruno, J. F., C. W. Kennedy, T. A. Rand, and M. B. Grant. 2004. Landscape-scale patterns of biological invasions in shoreline plant communities. *Oikos* **107**:531-540.
- Byrne, K. M., W. K. Lauenroth, and L. McManus. 2010. Impacts of nonnative plant species on production and diversity in the front range of Colorado. *Western North American Naturalist* **70**:288-295.
- Capers, R. S., R. Selsky, G. J. Bugbee, and J. C. White. 2007. Aquatic plant community invasibility and scale-dependent patterns in native and invasive species richness. *Ecology* **88**:3135-3143.
- Carboni, M., W. Thuiller, F. Izzi, and A. Acosta. 2010. Disentangling the relative effects of environmental versus human factors on the abundance of native and alien plant species in Mediterranean sandy shores. *Diversity and Distributions* **16**:537-546.
- Celesti-Grapow, L., P. Pyšek, V. Jarošík, and C. Blasi. 2006. Determinants of native and alien species richness in the urban flora of Rome. *Diversity and Distributions* **12**:490-501.

Chaneton, E., S. Perelman, and R. León. 2005. Floristic heterogeneity of Flooding Pampa grasslands: a multi-scale analysis. *Plant Biosystems-An International Journal Dealing with all Aspects of Plant Biology* **139**:245-254.

Chen, H., H. Qian, G. Spyreas, and M. Crossland. 2010. BIODIVERSITY RESEARCH: Native-exotic species richness relationships across spatial scales and biotic homogenization in wetland plant communities of Illinois, USA. *Diversity and Distributions* **16**:737-743.

Chong, G. W., Y. Otsuki, T. J. Stohlgren, D. Guenther, P. Evangelista, C. Villa, and A. Waters. 2006. Evaluating plant invasions from both habitat and species perspectives. *Western North American Naturalist* **66**:92-105.

Chown, S. L., B. Hull, and K. J. Gaston. 2005. Human impacts, energy availability and invasion across Southern Ocean Islands. *Global Ecology and Biogeography* **14**:521-528.

Cleland, E. E., M. D. Smith, S. J. Andelman, C. Bowles, K. M. Carney, M. Claire Horner-Devine, J. M. Drake, S. M. Emery, J. M. Gramling, and D. B. Vandermast. 2004. Invasion in space and time: non-native species richness and relative abundance respond to interannual variation in productivity and diversity. *Ecology Letters* **7**:947-957.

Compagnoni, A., and C. B. Halpern. 2009. Properties of native plant communities do not determine exotic success during early forest succession. *Ecography* **32**:449-458.

Corenblit, D., J. Steiger, E. Tabacchi, E. González, and A. M. Planty-Tabacchi. 2014. Ecosystem engineers modulate exotic invasions in riparian plant communities by modifying hydrogeomorphic connectivity. *River Research and Applications* **30**:45-59.

Crall, A. W., G. J. Newman, T. J. Stohlgren, C. S. Jarnevich, P. Evangelista, and D. Guenther. 2006. Evaluating dominance as a component of non-native species invasions. *Diversity and Distributions* **12**:195-204.

\*Crawley, M. J., S. L. Brown, M. S. Heard, and G. R. Edwards. 1999. Invasion-resistance in experimental grassland communities: species richness or species identity? *Ecology Letters* **2**:140-148.

Cully, A. C., J. F. Cully, and R. D. Hiebert. 2003. Invasion of exotic plant species in tallgrass prairie fragments. *Conservation Biology* **17**:990-998.

Davies, K. F., P. Chesson, S. Harrison, B. D. Inouye, B. A. Melbourne, and K. J. Rice. 2005. Spatial heterogeneity explains the scale dependence of the native-exotic diversity

- relationship. *Ecology* **86**:1602-1610.
- Davies, K. F., S. Harrison, H. D. Safford, and J. H. Viers. 2007. Productivity alters the scale dependence of the diversity–invasibility relationship. *Ecology* **88**:1940-1947.
- de Albuquerque, F. S., P. Castro-Díez, M. Á. Rodríguez, and L. Cayuela. 2011. Assessing the influence of environmental and human factors on native and exotic species richness. *Acta Oecologica* **37**:51-57.
- Deutschewitz, K., A. Lausch, I. Kühn, and S. Klotz. 2003. Native and alien plant species richness in relation to spatial heterogeneity on a regional scale in Germany. *Global Ecology and Biogeography* **12**:299-311.
- \*Dimitrakopoulos, P. G., A. Galanidis, A.-S. D. Siamantziouras, and A. Y. Troumbis. 2005. Short-term invasibility patterns in burnt and unburnt experimental Mediterranean grassland communities of varying diversities. *Oecologia* **143**:428-437.
- \*Dodson, E. K., K. L. Metlen, and C. E. Fiedler. 2007. Common and Uncommon Understory Species Differentially Respond to Restoration Treatments in Ponderosa Pine/Douglas-Fir Forests, Montana. *Restoration Ecology* **15**:696-708.
- Dyderski, M. K., A. K. Gdula, and A. M. Jagodziński. 2015. “The rich get richer” concept in riparian woody species—A case study of the Warta River Valley (Poznań, Poland). *Urban Forestry & Urban Greening* **14**:107-114.
- \*Fargione, J., C. S. Brown, and D. Tilman. 2003. Community assembly and invasion: an experimental test of neutral versus niche processes. *Proceedings of the National Academy of Sciences* **100**:8916-8920.
- \*Fargione, J. E., and D. Tilman. 2005. Diversity decreases invasion via both sampling and complementarity effects. *Ecology Letters* **8**:604-611.
- Figueroa, J. A., S. Teillier, and S. A. Castro. 2011. Diversity patterns and composition of native and exotic floras in central Chile. *Acta Oecologica* **37**:103-109.
- Fornwalt, P. J., M. R. Kaufmann, and T. J. Stohlgren. 2010. Impacts of mixed severity wildfire on exotic plants in a Colorado ponderosa pine–Douglas-fir forest. *Biological Invasions* **12**:2683-2695.
- Freeman, J. P., T. J. Stohlgren, M. E. Hunter, P. N. Omi, E. J. Martinson, G. W. Chong, and C. S. Brown. 2007. Rapid assessment of postfire plant invasions in coniferous forests of the

- western United States. *Ecological Applications* **17**:1656-1665.
- Fridley, J. D., H. Qian, P. S. White, and M. W. Palmer. 2006. Plant species invasions along the latitudinal gradient in the United States: comment. *Ecology* **87**:3209-3213.
- Fuentes, N., A. Pauchard, P. Sánchez, J. Esquivel, and A. Marticorena. 2013. A new comprehensive database of alien plant species in Chile based on herbarium records. *Biological Invasions* **15**:847-858.
- Gilbert, B., and M. J. Lechowicz. 2005. Invasibility and abiotic gradients: the positive correlation between native and exotic plant diversity. *Ecology* **86**:1848-1855.
- Godfree, R., B. Lepschi, D. Mallinson, and S. Wiser. 2004. Ecological filtering of exotic plants in an Australian sub-alpine environment. *Journal of Vegetation Science* **15**:227-236.
- Gong, C., J. Chen, and S. Yu. 2013. Biotic homogenization and differentiation of the flora in artificial and near-natural habitats across urban green spaces. *Landscape and Urban Planning* **120**:158-169.
- Gray, A. N., and D. L. Azuma. 2005. Repeatability and implementation of a forest vegetation indicator. *Ecological Indicators* **5**:57-71.
- Guo, Q. 2001. Early post-fire succession in California chaparral: Changes in diversity, density, cover and biomass. *Ecological Research* **16**:471-485.
- \*Guo, Q., and A. Symstad. 2008. A Two-Part Measure of Degree of Invasion for Cross-Community Comparisons. *Conservation Biology* **22**:666-672.
- Harrison, S., H. Cornell, and J. B. Grace. 2015. Does natural variation in diversity affect biotic resistance? *Journal of Ecology* **103**:1099-1106.
- Harrison, S., J. B. Grace, K. F. Davies, H. D. Safford, and J. H. Viers. 2006. Invasion in a diversity hotspot: exotic cover and native richness in the Californian serpentine flora. *Ecology* **87**:695-703.
- \*Hector, A., K. Dobson, A. Minns, E. Bazeley-White, and J. Hartley Lawton. 2001. Community diversity and invasion resistance: an experimental test in a grassland ecosystem and a review of comparable studies. *Ecological Research* **16**:819-831.
- Hill, K. C., and D. G. Fischer. 2014. Native–exotic species richness relationships across spatial scales in a prairie restoration matrix. *Restoration Ecology* **22**:204-213.
- \*Hu, Y.-H., D.-Y. Sheng, Y.-Z. Xiang, Z.-J. Yang, D.-P. Xu, N.-N. Zhang, and L.-L. Shi. 2013.

- The environment, not space, dominantly structures the landscape patterns of the richness and composition of the tropical understory vegetation. *PloS One* **8**:e81308.
- Huntly, N., R. Bangert, and S. E. Hanser. 2011. Native and exotic plants of fragments of sagebrush steppe produced by geomorphic processes versus land use. *Plant Ecology* **212**:1549-1561.
- Jauni, M., and T. Hyvönen. 2012. Positive diversity–invasibility relationships across multiple scales in Finnish agricultural habitats. *Biological Invasions* **14**:1379-1391.
- Jones, R. O., and S. K. Chapman. 2011. The roles of biotic resistance and nitrogen deposition in regulating non-native understory plant diversity. *Plant and Soil* **345**:257-269.
- Kalkhan, M. A., E. J. Stafford, P. J. Woodly, and T. J. Stohlgren. 2007. Assessing exotic plant species invasions and associated soil characteristics: a case study in eastern Rocky Mountain National Park, Colorado, USA, using the pixel nested plot design. *Applied Soil Ecology* **35**:622-634.
- Keeley, J. E., M. Baer-Keeley, and C. Fotheringham. 2005. Alien plant dynamics following fire in Mediterranean-climate California shrublands. *Ecological Applications* **15**:2109-2125.
- Keeley, J. E., D. Lubin, and C. Fotheringham. 2003. Fire and grazing impacts on plant diversity and alien plant invasions in the southern Sierra Nevada. *Ecological applications* **13**:1355-1374.
- \*Knops, J. M., D. Tilman, N. M. Haddad, S. Naeem, C. Mitchell, J. Haarstad, M. Ritchie, K. Howe, P. Reich, and E. Siemann. 1999. Effects of plant species richness on invasion dynamics, disease outbreaks, insect abundances and diversity. *Ecology Letters* **2**:286-293.
- \*Kolb, A., P. Alpert, D. Enters, and C. Holzappel. 2002. Patterns of invasion within a grassland community. *Journal of Ecology* **90**:871-881.
- \*Koper, N., K. E. Mozel, and D. C. Henderson. 2010. Recent declines in northern tall-grass prairies and effects of patch structure on community persistence. *Biological Conservation* **143**:220-229.
- Kühn, I., and S. Klotz. 2003. The alien flora of Germany—basics from a new German database. Pages 89-100 in L.E. Child, J.H. Brock, G. Brundu, K. Prach, P. Pyšek, P.M. Wade and M. Williamson editors. *Plant invasions: ecological threats and management solutions*. Backhuys Publishers, Leiden.

- Kumar, S., T. J. Stohlgren, and G. W. Chong. 2006. Spatial heterogeneity influences native and nonnative plant species richness. *Ecology* **87**:3186-3199.
- Lavoie, C., M. Jean, F. Delisle, and G. Létourneau. 2003. Exotic plant species of the St Lawrence River wetlands: a spatial and historical analysis. *Journal of Biogeography* **30**:537-549.
- Lilley, P. L., and M. Vellend. 2009. Negative native–exotic diversity relationship in oak savannas explained by human influence and climate. *Oikos* **118**:1373-1382.
- Lososová, Z., M. Chytrý, L. Tichý, J. Danihelka, K. Fajmon, O. Hájek, K. Kintrová, I. Kühn, D. Láníková, and Z. Otýpková. 2012. Native and alien floras in urban habitats: a comparison across 32 cities of central Europe. *Global Ecology and Biogeography* **21**:545-555.
- MacDougall, A., J. Boucher, R. Turkington, G. Bradfield, and V. Pillar. 2006. Patterns of plant invasion along an environmental stress gradient. *Journal of Vegetation Science* **17**:47-56.
- \*MacDougall, A. S., J. R. Bennett, J. Firn, E. W. Seabloom, E. T. Borer, E. M. Lind, J. L. Orrock, W. S. Harpole, Y. Hautier, and P. B. Adler. 2014. Anthropogenic-based regional-scale factors most consistently explain plot-level exotic diversity in grasslands. *Global Ecology and Biogeography* **23**:802-810.
- Magee, T. K., P. L. Ringold, and M. A. Bollman. 2008. Alien species importance in native vegetation along wadeable streams, John Day River basin, Oregon, USA. *Plant Ecology* **195**:287-307.
- Marini, L., K. J. Gaston, F. Prosser, and P. E. Hulme. 2009. Contrasting response of native and alien plant species richness to environmental energy and human impact along alpine elevation gradients. *Global Ecology and Biogeography* **18**:652-661.
- Martín-Forés, I., I. Castro, B. Acosta-Gallo, A. del Pozo, L. Sánchez-Jardón, J. M. de Miguel, C. Ovalle, and M. A. Casado. 2016. Alien plant species coexist over time with native ones in Chilean Mediterranean grasslands. *Journal of Plant Ecology* **9**:682-691.
- Maskell, L., J. Bullock, S. Smart, K. Thompson, P. Hulme, and A. Chiarucci. 2006. The distribution and habitat associations of non-native plant species in urban riparian habitats. *Journal of Vegetation Science* **17**:499-508.
- Matthews, J. W., A. L. Peralta, A. Soni, P. Baldwin, A. D. Kent, and A. G. Endress. 2009. Local and landscape correlates of non-native species invasion in restored wetlands. *Ecography* **32**:1031-1039.

- \*McGranahan, D. A., D. M. Engle, B. J. Wilsey, S. D. Fuhlendorf, J. R. Miller, and D. M. Debinski. 2012. Grazing and an invasive grass confound spatial pattern of exotic and native grassland plant species richness. *Basic and Applied Ecology* **13**:654-662.
- McIntyre, S., P. Ladiges, and G. Adams. 1988. Plant species-richness and invasion by exotics in relation to disturbance of wetland communities on the Riverine Plain, NSW. *Austral Ecology* **13**:361-371.
- McIntyre, S., and S. Lavorel. 1994. Predicting richness of native, rare, and exotic plants in response to habitat and disturbance variables across a variegated landscape. *Conservation Biology* **8**:521-531.
- Meiners, S. J., S. T. Pickett, and M. L. Cadenasso. 2002. Exotic plant invasions over 40 years of old field successions: community patterns and associations. *Ecography* **25**:215-223.
- Morgan, J. W. 1998. Patterns of invasion of an urban remnant of a species-rich grassland in southeastern Australia by non-native plant species. *Journal of Vegetation Science* **9**:181-190.
- Nobis, A., M. Żmihorski, and D. Kotowska. 2016. Linking the diversity of native flora to land cover heterogeneity and plant invasions in a river valley. *Biological Conservation* **203**:17-24.
- Okimura, T., D. Koide, and A. S. Mori. 2016. Differential processes underlying the roadside distributions of native and alien plant assemblages. *Biodiversity and Conservation* **25**:995-1009.
- \*Ortega, Y. K., and D. E. Pearson. 2005. Weak vs. strong invaders of natural plant communities: assessing invasibility and impact. *Ecological Applications* **15**:651-661.
- Parker, J. D., L. J. Richie, E. M. Lind, and K. O. Maloney. 2010. Land use history alters the relationship between native and exotic plants: the rich don't always get richer. *Biological Invasions* **12**:1557-1571.
- Peltzer, D. A., and C. J. MacLeod. 2014. Weeds and native plant species are negatively associated along grassland and kiwifruit land management intensity gradients. *Austral Ecology* **39**:39-49.
- Perelman, S. B., E. J. Chaneton, W. B. Batista, S. E. Burkart, and R. J. Leon. 2007. Habitat stress, species pool size and biotic resistance influence exotic plant richness in the Flooding



- Pampa grasslands. *Journal of Ecology* **95**:662-673.
- \*Petermann, J. S., A. J. Fergus, C. Roscher, L. A. Turnbull, A. Weigelt, and B. Schmid. 2010. Biology, chance, or history? The predictable reassembly of temperate grassland communities. *Ecology* **91**:408-421.
- \*Pfisterer, A. B., J. Joshi, B. Schmid, and M. Fischer. 2004. Rapid decay of diversity-productivity relationships after invasion of experimental plant communities. *Basic and Applied Ecology* **5**:5-14.
- Pyšek, P. 1998. Alien and native species in Central European urban floras: a quantitative comparison. *Journal of Biogeography* **25**:155-163.
- Richardson, D. M., M. Rouget, S. J. Ralston, R. M. Cowling, B. J. Van Rensburg, and W. Thuiller. 2009. Species richness of alien plants in South Africa: environmental correlates and the relationship with indigenous plant species richness. *Ecoscience*.
- Ricotta, C., S. Godefroid, and D. Rocchini. 2010. Patterns of native and exotic species richness in the urban flora of Brussels: rejecting the 'rich get richer' model. *Biological Invasions* **12**:233-240.
- Rojas, I., P. Becerra, N. Gálvez, J. Laker, C. Bonacic, and A. Hester. 2011. Relationship between fragmentation, degradation and native and exotic species richness in an Andean temperate forest of Chile/Relación entre fragmentación, degradación y riqueza de especies nativas y exóticas en un bosque templado andino de Chile. *Gayana Botanica* **68**:163.
- \*Roscher, C., H. Beßler, Y. Oelmann, C. Engels, W. Wilcke, and E. D. Schulze. 2009a. Resources, recruitment limitation and invader species identity determine pattern of spontaneous invasion in experimental grasslands. *Journal of Ecology* **97**:32-47.
- \*Roscher, C., B. Schmid, and E. D. Schulze. 2009b. Non-random recruitment of invader species in experimental grasslands. *Oikos* **118**:1524-1540.
- Rose, S., and P. G. Fairweather. 1997. Changes in floristic composition of urban bushland invaded by *Pittosporum undulatum* in northern Sydney, Australia. *Australian Journal of Botany* **45**:123-149.
- \*Ruijven, J., G. B. De Deyn, and F. Berendse. 2003. Diversity reduces invasibility in experimental plant communities: the role of plant species. *Ecology Letters* **6**:910-918.
- Satterlee, S. R. 2012. The Role of Native Diversity and Successional Processes on

- Community invasibility in Riparian Primary Forest. Youngstown State University.
- Sax, D. F. 2002. Native and naturalized plant diversity are positively correlated in scrub communities of California and Chile. *Diversity and Distributions* **8**:193-210.
- Schulz, B. K., and A. N. Gray. 2013. The new flora of northeastern USA: quantifying introduced plant species occupancy in forest ecosystems. *Environmental Monitoring and Assessment* **185**:3931-3957.
- Smith, M. D., and A. K. Knapp. 1999. Exotic plant species in a C<sub>4</sub>-dominated grassland: invasibility, disturbance, and community structure. *Oecologia* **120**:605-612.
- Souza, L., W. A. Bunn, D. Simberloff, R. M. Lawton, and N. J. Sanders. 2011. Biotic and abiotic influences on native and exotic richness relationship across spatial scales: favourable environments for native species are highly invasible. *Functional Ecology* **25**:1106-1112.
- Stohlgren, T. J., D. T. Barnett, and J. T. Kartesz. 2003. The rich get richer: patterns of plant invasions in the United States. *Frontiers in Ecology and the Environment* **1**:11-14.
- Stohlgren, T. J., D. Binkley, G. W. Chong, M. A. Kalkhan, L. D. Schell, K. A. Bull, Y. Otsuki, G. Newman, M. Bashkin, and Y. Son. 1999a. Exotic plant species invade hot spots of native plant diversity. *Ecological Monographs* **69**:25-46.
- Stohlgren, T. J., K. A. Bull, Y. Otsuki, C. A. Villa, and M. Lee. 1998. Riparian zones as havens for exotic plant species in the central grasslands. *Plant Ecology* **138**:113-125.
- Stohlgren, T. J., C. Crosier, G. W. Chong, D. Guenther, and P. Evangelista. 2005a. Life-history habitat matching in invading non-native plant species. *Plant and Soil* **277**:7-18.
- Stohlgren, T. J., D. A. Guenther, P. H. Evangelista, and N. Alley. 2005b. Patterns of plant species richness, rarity, endemism, and uniqueness in an arid landscape. *Ecological Applications* **15**:715-725.
- Stohlgren, T. J., C. Jarnevich, G. W. Chong, and P. H. Evangelista. 2006. Scale and plant invasions: a theory of biotic acceptance. *Preslia* **78**:405-426.
- Stohlgren, T. J., Y. Otsuki, C. A. Villa, M. Lee, and J. Belnap. 2001. Patterns of plant invasions: a case example in native species hotspots and rare habitats. *Biological Invasions* **3**:37-50.
- Stohlgren, T. J., A. J. Owen, and M. Lee. 2000. Monitoring shifts in plant diversity in response to climate change: a method for landscapes. *Biodiversity and Conservation* **9**:65-86.
- Stohlgren, T. J., L. D. Schell, and B. Vanden Heuvel. 1999b. How grazing and soil quality affect

- native and exotic plant diversity in Rocky Mountain grasslands. *Ecological Applications* **9**:45-64.
- Stokes, K., K. Ward, and M. Colloff. 2010. Alterations in flood frequency increase exotic and native species richness of understorey vegetation in a temperate floodplain eucalypt forest. *Plant Ecology* **211**:219-233.
- Suding, K. N., and K. L. Gross. 2006. Modifying native and exotic species richness correlations: the influence of fire and seed addition. *Ecological Applications* **16**:1319-1326.
- Symonds, J. E., and J. Pither. 2012. Multi-scale analyses of exotic and native plant species diversity within Canada's endangered antelope-brush ecosystem. *Plant Ecology* **213**:1263-1275.
- Tabacchi, E., and A.-M. Planty-Tabacchi. 2005. Exotic and native plant community distributions within complex riparian landscapes: a positive correlation. *Ecoscience* **12**:412-423.
- Tanentzap, A. J., D. R. Bazely, and R. Laforzezza. 2010. Diversity–invasibility relationships across multiple scales in disturbed forest understoreys. *Biological Invasions* **12**:2105-2116.
- \*Tilman, D. 1997. Community invasibility, recruitment limitation, and grassland biodiversity. *Ecology* **78**:81-92.
- Tomasetto, F., R. P. Duncan, and P. E. Hulme. 2013. Environmental gradients shift the direction of the relationship between native and alien plant species richness. *Diversity and Distributions* **19**:49-59.
- \*Troumbis, A. Y., A. Galanidis, and G. D. Kokkoris. 2002. Components of short-term invasibility in experimental Mediterranean grasslands. *Oikos* **98**:239-250.
- Vidra, R. L., T. H. Shear, and T. R. Wentworth. 2006. Testing the paradigms of exotic species invasion in urban riparian forests. *Natural Areas Journal* **26**:339-350.
- Von Holle, B. 2013. Environmental stress alters native-nonnative relationships at the community scale. *Biological Invasions* **15**:417-427.
- \*Wania, A., I. Kühn, and S. Klotz. 2006. Plant richness patterns in agricultural and urban landscapes in Central Germany—spatial gradients of species richness. *Landscape and Urban Planning* **75**:97-110.
- Williams, J. W., E. W. Seabloom, D. Slayback, D. M. Stoms, and J. H. Viers. 2005.

Anthropogenic impacts upon plant species richness and net primary productivity in California. *Ecology Letters* **8**:127-137.

\*Zhu, D. H., P. Wang, W. Z. Zhang, Y. Yuan, B. Li, and J. Wang. 2015. Sampling and Complementarity Effects of Plant Diversity on Resource Use Increases the Invasion Resistance of Communities. *PloS one* **10**:e0141559.
