# Supplementary material for: Correlation of native and exotic species richness: a global meta‐analysis finds no invasion paradox across scales
Source: PubMed Central journal article supplement — Ecology. 2019 Jan 2;100(1):e02552. doi: 10.1002/ecy.2552 (PMC6849851; doi:10.1002/ecy.2552), 2019-01-02
Supplement: ECY-100-na-s007.pdf [file ECY-100-na-s007.pdf]

**S. Peng, N. L. Kinlock, J. Gurevitch, and S. Peng. Correlation of native and exotic species richness: a global meta-analysis finds no invasion paradox across scales. *Ecology*. 2018.**

---

## **Data S1**

**Database of studies included only in the systematic review.**

---

## **Authors**

S. Peng  
State Key Laboratory of Biocontrol, School of Life Sciences, Sun Yat-Sen University,  
Guangzhou, 510275, China  
[pengshijia1010@163.com](mailto:pengshijia1010@163.com)

N. L. Kinlock  
Department of Ecology and Evolution, Stony Brook University, Stony Brook, New York,  
11794, USA  
[nicole.kinlock@stonybrook.edu](mailto:nicole.kinlock@stonybrook.edu)

J. Gurevitch  
Department of Ecology and Evolution, Stony Brook University, Stony Brook, New York,  
11794, USA  
[jessica.gurevitch@stonybrook.edu](mailto:jessica.gurevitch@stonybrook.edu)

S. Peng  
State Key Laboratory of Biocontrol, School of Life Sciences, Sun Yat-Sen University,  
Guangzhou, 510275, China  
[lsspsl@mail.sysu.edu](mailto:lsspsl@mail.sysu.edu)

---

## **File list (file found within DataS1.zip)**

DataS1\_SystematicReviewDatabase.csv

## **Description**

DataS1\_SystematicReviewDatabase.csv - CSV file with database containing data used only in the systematic review, not the meta-analysis. Each entry describes a single case.

---
