# Supplementary material for: Correlation of native and exotic species richness: a global meta‐analysis finds no invasion paradox across scales
Source: PubMed Central journal article supplement — Ecology. 2019 Jan 2;100(1):e02552. doi: 10.1002/ecy.2552 (PMC6849851; doi:10.1002/ecy.2552), 2019-01-02
Supplement: ECY-100-na-s009.pdf [file ECY-100-na-s009.pdf]

**S. Peng, N. L. Kinlock, J. Gurevitch, and S. Peng. Correlation of native and exotic species richness: a global meta-analysis finds no invasion paradox across scales. *Ecology*. 2018.**

---

## **Data S3**

**Database of experimental studies not included in meta-analyses.**

---

## **Authors**

S. Peng  
State Key Laboratory of Biocontrol, School of Life Sciences, Sun Yat-Sen University,  
Guangzhou, 510275, China  
[pengshijia1010@163.com](mailto:pengshijia1010@163.com)

N. L. Kinlock  
Department of Ecology and Evolution, Stony Brook University, Stony Brook, New York,  
11794, USA  
[nicole.kinlock@stonybrook.edu](mailto:nicole.kinlock@stonybrook.edu)

J. Gurevitch  
Department of Ecology and Evolution, Stony Brook University, Stony Brook, New York,  
11794, USA  
[jessica.gurevitch@stonybrook.edu](mailto:jessica.gurevitch@stonybrook.edu)

S. Peng  
State Key Laboratory of Biocontrol, School of Life Sciences, Sun Yat-Sen University,  
Guangzhou, 510275, China  
[lsspsl@mail.sysu.edu](mailto:lsspsl@mail.sysu.edu)

---

## **File list (file found within DataS3.zip)**

DataS3\_ExperimentalStudiesDatabase.csv

## **Description**

DataS3\_ExperimentalStudiesDatabase.csv - CSV file with database containing data from experimental studies that were not included in meta-analyses. These studies were, however, included in the systematic review. These studies were used to

calculate a single effect size (Fisher's  $z$ ) among experimental studies. Each entry describes a single case.

---
